# Supplementary material for: Suppression of myeloid PFKFB3‐driven glycolysis protects mice from choroidal neovascularization
Source: PubMed Central journal article supplement — Br J Pharmacol. 2022 Aug 9;179(22):5109–31. doi: 10.1111/bph.15925 (PMC9804921; doi:10.1111/bph.15925), 2022-08-09
Supplement: BPH-179-5109-s001.pdf [file BPH-179-5109-s001.pdf]

## Supporting information

**Table S1. Antibodies used for western blot analysis.**

| Target protein                       | Company                   | Catalog number | Concentration |
|--------------------------------------|---------------------------|----------------|---------------|
| Pfkfb3                               | Abcam                     | ab181861       | 1:1000        |
| Hif1a                                | R&D Systems               | AF1935-SP      | 1:1000        |
| Hif2a                                | Novus                     | NB100-122      | 1:500         |
| P-p65                                | Cell Signaling Technology | 3033S          | 1:1000        |
| P65                                  | Cell Signaling Technology | 8242S          | 1:1000        |
| Il1b                                 | R&D Systems               | AF-401-NA      | 1:1000        |
| $\beta$ -actin                       | Santa Cruz Biotechnology  | sc-47778       | 1:1000        |
| Anti-mouse IgG, HRP-linked Antibody  | Cell Signaling Technology | 7076S          | 1:2000        |
| Anti-rabbit IgG, HRP-linked antibody | Cell Signaling Technology | 7074S          | 1:2000        |
| mouse anti-goat IgG-HRP              | Santa Cruz Biotechnology  | sc-2354        | 1:2000        |

**Table S2. Antibodies used for immunostaining analysis.**

| Target protein                                                 | Company                   | Catalog number | Concentration |
|----------------------------------------------------------------|---------------------------|----------------|---------------|
| isolectin-B4                                                   | Invitrogen                | I21411         | 1:100         |
| F4/80                                                          | Abcam                     | ab6640         | 1:100         |
| Pfkfb3                                                         | Abcam                     | ab181861       | 1:100         |
| Arg1                                                           | Sigma                     | AV45673        | 1:100         |
| Il1b                                                           | Abcam                     | ab9722         | 1:100         |
| Hif1a                                                          | R&D Systems               | AF1935-SP      | 1:100         |
| Hif2a                                                          | Novus                     | NB100-122      | 1:100         |
| HK1                                                            | Proteintech               | 19662-1-AP     | 1:100         |
| Glut1                                                          | Abcam                     | ab115730       | 1:100         |
| Pkm2                                                           | Cell Signaling Technology | 4053           | 1:100         |
| P-p65                                                          | Cell Signaling Technology | 3033S          | 1:100         |
| Alexa Fluor 488-conjugated goat anti-rat secondary antibody    | Invitrogen                | A11006         | 1:200         |
| Alexa Fluor 594-conjugated goat anti-rabbit secondary antibody | Invitrogen                | A11012         | 1:200         |
| Alexa Fluor 594-conjugated goat anti-rat secondary antibody    | Invitrogen                | A11007         | 1:200         |
| Alexa Fluor 647-conjugated goat anti-rabbit secondary antibody | Invitrogen                | A21244         | 1:200         |
| Alexa Fluor 594-conjugated donkey anti-goat secondary antibody | Invitrogen                | A11058         | 1:200         |
| Alexa Fluor 647-conjugated donkey anti-rat secondary antibody  | Invitrogen                | A78947         | 1:200         |

**Table S3. Primer sets used for qRT-PCR (F: forward primer; R: reverse primer)**

| Target gene                    | Sequence                                                                   |
|--------------------------------|----------------------------------------------------------------------------|
| mouse <i>18S ribosomal RNA</i> | F: 5'- CTTAGAGGGACAAGTGGCG -3'<br>R: 5'- ACGCTGAGCCAGTCAGTGTA -3'          |
| mouse <i>Rpl13a</i>            | F:5'- GAGGTCCGGTGGAAAGTACCA -3'<br>R:5'- TGCATCTTGGCCTTTTCCTT -3'          |
| mouse <i>Slc2a1</i>            | F: 5'- GCAGTTCGGCTATAACACTGG -3'<br>R: 5'- GCGGTGGTTCCATGTTTGATTG -3'      |
| mouse <i>Hk1</i>               | F: 5'- AACGGCCTCCGTCAAGATG -3'<br>R: 5'- GCCGAGATCCAGTGCAATG -3'           |
| mouse <i>Hk2</i>               | F: 5'- ATGATCGCCTGCTTATTCACG -3'<br>R: 5'- CGCCTAGAAATCTCCAGAAGGG -3'      |
| mouse <i>Gpi</i>               | F: 5'- CTCAAGCTGCGCGAACTTTTT -3'<br>R: 5'- GGTTCCTGGAGTAGTCCACCAG -3'      |
| mouse <i>Pfkfb3</i>            | F: 5'- GATCTGGGTGCCCGTCGATCACCG -3'<br>R: 5'- CAGTTGAGGTAGCGAGTCAGCTTC -3' |
| mouse <i>Aldoa</i>             | F:5'- AGTCCACCGGAAGCATTGC -3'<br>R:5'- CAGCCCCTGGGTAGTTGTC -3'             |
| mouse <i>Pgk1</i>              | F:5'- ATGTCGCTTCCAACAAGCTG -3'<br>R:5'- GCTCCATTGTCCAAGCAGAAT -3'          |
| mouse <i>Eno1</i>              | F:5'- TCGTCCACTGGCATCTAC -3'<br>R:5'- CAGAGCAGGCGCAATAGTTTTA -3'           |
| mouse <i>Pdk1</i>              | F:5'- GGACTTCGGGTCAGTGAATGC -3'<br>R:5'- TCCTGAGAAGATTGTCGGGGA -3'         |
| mouse <i>Ldha</i>              | F:5'- ACATTGTCAAGTACAGTCCACAC -3'<br>R:5'- TTCCAATTACTCGGTTTTTGGGA -3'     |
| mouse <i>Ldhb</i>              | F:5'- TCGTCCGTTGCAGATGAT-3'<br>R:5'- TTTCGGAGTCTGGAGGAACAA-3'              |
| mouse <i>Pkm2</i>              | F:5'- AGGATGCCGTGCTGAATG -3'<br>R:5'- TAGAAGAGGGGCTCCAGAGG -3'             |
| mouse <i>Cd163</i>             | F:5'- GGTGGACACAGAATGGTTCTTC -3'<br>R:5'- CCAGGAGCGTTAGTGACAGC -3'         |
| mouse <i>Cd206</i>             | F:5'- TCTTTGCCTTTCCAGTCTCC -3'<br>R:5'- TGACACCCAGCGGAATTTC -3'            |
| mouse <i>Arg1</i>              | F:5'- CAGAAGAATGGAAGAGTCAG -3'<br>R:5'- CAGATATGCAGGGAGTCACC -3'           |
| mouse <i>Retnla</i>            | F:5'- CCCTGCTGGGATGACTGCTA -3'<br>R:5'- TCCACTCTGGATCTCCCAAGA -3'          |
| mouse <i>Mgl1</i>              | F:5'- CAGAATCGCTTAGCCAATGTGG -3'<br>R:5'- TCCAGTCCGTGTCCGAAC -3'           |
| mouse <i>Mgl2</i>              | F:5'- TTCAAGAATTGGAGGCCACT -3'<br>R:5'- CAGACATCGTCATTCCAACG -3'           |
| mouse <i>Irf4</i>              | F:5'- TCCGACAGTGGTTGATCGAC -3'<br>R:5'- CCTCACGATTGTAGTCCTGCTT -3'         |
| mouse <i>Chi3l3</i>            | F:5'- GGAGTAGAGACCATGGCACTGAAC -3'<br>R:5'- GACTTGCCTGACTATGAAGCATTG -3'   |
| mouse <i>Il10</i>              | F:5'- GCTATGCTGCCTGCTCTTACT -3'<br>R:5'- CCTGCTGATCCTCATGCCA -3'           |
| mouse <i>Cd11c</i>             | F:5'- TCGTTGGCCTCTAACGAGCTTTCT -3'<br>R:5'- AGGATAACATGGAAGCACGGACCA -3'   |
| mouse <i>Cd80</i>              | F:5'- ACCCCAACATAACTGAGTCT -3'<br>R:5'- TTCCAACCAAGAGAAGCGAGG -3'          |

|                      |                                                                          |
|----------------------|--------------------------------------------------------------------------|
| mouse <i>Il6</i>     | F:5'- GTTCTCTGGGAAATCGTGGA -3'<br>R:5'- TGTACTCCAGGTAGCTATGG -3'         |
| mouse <i>Il1b</i>    | F:5'- TGTCTTGGCCGAGGACTAAGG -3'<br>R:5'- TGGGCTGGACTGTTTCTAATGC -3'      |
| mouse <i>Tnfa</i>    | F:5'- ACGGCATGGATCTCAAAGAC -3'<br>R:5'- AGATAGCAAATCGGCTGACG -3'         |
| mouse <i>Nos2</i>    | F:5'- CAGCTGGGCTGTACAAACCTT -3'<br>R:5'- CATTGGAAGTGAAGCGTTTCG -3'       |
| mouse <i>Cxcl10</i>  | F:5'- GAGCCTATCCTGCCCACG -3'<br>R:5'- GGAGCCCTTTTAGACCTT -3'             |
| mouse <i>Angptl4</i> | F:5'- CATCCTGGGACGAGATGAACT -3'<br>R:5'- TGACAAGCGTTACCACAGGC -3'        |
| mouse <i>Tgfb1</i>   | F:5'- ATGGTGGACCGCAACAAC -3'<br>R:5'- CCAAGGTAACGCCAGGAA -3'             |
| mouse <i>Vegf</i>    | F:5'- TCACCAAAGCCAGCACATAGGAGA -3'<br>R:5'- TTTCTCCGCTCTGAACAAGGCTCA -3' |
| mouse <i>Fgf2</i>    | F:5'- GCGACCCACACGTCAAATA -3'<br>R:5'- TCCCTTGATAGACACAACCTCCTC -3'      |
| mouse <i>Hbegf</i>   | F:5'- CGGGGAGTGCAGATACCTG -3'<br>R:5'- TTCTCCACTGGTAGAGTCAGC -3'         |
| mouse <i>Hgf</i>     | F:5'- ATGTGGGGGACCAAACCTTCTG -3'<br>R:5'- GGATGGCGACATGAAGCAG -3'        |
| mouse <i>Pgf</i>     | F:5'- GTCTGCTGGGAACAACCTCAACA -3'<br>R:5'- CACCTCATCAGGGTATTCATCCA -3'   |
| mouse <i>Mmp9</i>    | F:5'- TTGAAGTCTCAGAAGGTGGAT -3'<br>R:5'- GCAGGAGGTCGTAGGTCAC -3'         |
| mouse <i>Mmp12</i>   | F:5'- AAAGTGGGTTGTAGCATTGC -3'<br>R:5'- AGAAGGCAGACCAGGACAC -3'          |
| mouse <i>Mmp2</i>    | F:5'- CCTGGACCCTGAAACCGTG -3'<br>R:5'- TCCCATCATGGATTTCGAGAA -3'         |
| mouse <i>Vegf</i>    | F:5'- TCACCAAAGCCAGCACATAGGAGA -3'<br>R:5'- TTTCTCCGCTCTGAACAAGGCTCA -3' |

**Table S4. Antibodies used for FACS analysis.**

| Target protein               | Company        | Catalog number | Concentration |
|------------------------------|----------------|----------------|---------------|
| PerCP-Cy5.5 anti-mouse CD11b | BD Biosciences | 561114         | 2 µg/ml       |
| PE-anti-mouse F4/80          | BD Biosciences | 565410         | 3 µg/ml       |
| FITC anti-mouse CD206        | Biolegend      | 141703         | 6 µg/ml       |
| BV510 anti-mouse CD11c       | BD Biosciences | 562949         | 3 µg/ml       |

**Table S5. Demographic Information of Control Patients.**

| Identifier | Age | Sex | Race             | Eye | Sample  | Setting of Sample Collection | Prior Anti VEGF treatment | Time since last anti-VEGF |
|------------|-----|-----|------------------|-----|---------|------------------------------|---------------------------|---------------------------|
| Patient 1  | 45  | F   | White            | OS  | Aqueous | Cataract Surgery             | N/A                       | N/A                       |
| Patient 2  | 71  | M   | African American | OD  | Aqueous | Cataract Surgery             | N/A                       | N/A                       |
| Patient 3  | 47  | F   | White            | OD  | Aqueous | Cataract Surgery             | N/A                       | N/A                       |
| Patient 4  | 67  | F   | White            | OS  | Aqueous | Cataract Surgery             | N/A                       | N/A                       |
| Patient 5  | 52  | M   | White            | OD  | Aqueous | Cataract Surgery             | N/A                       | N/A                       |
| Patient 6  | 80  | M   | White            | OD  | Aqueous | Cataract Surgery             | N/A                       | N/A                       |
| Patient 7  | 86  | M   | Hispanic         | OS  | Aqueous | Cataract Surgery             | N/A                       | N/A                       |
| Patient 8  | 68  | M   | White            | OS  | Aqueous | Cataract Surgery             | N/A                       | N/A                       |
| Patient 9  | 82  | M   | White, Other     | OS  | Aqueous | Cataract Surgery             | N/A                       | N/A                       |
| Patient 10 | 76  | F   | White            | OS  | Aqueous | Cataract Surgery             | N/A                       | N/A                       |
| Patient 11 | 79  | F   | White            | OD  | Aqueous | Cataract Surgery             | N/A                       | N/A                       |
| Patient 12 | 80  | F   | White            | OD  | Aqueous | Cataract Surgery             | N/A                       | N/A                       |
| Patient 13 | 70  | F   | African American | OD  | Aqueous | Cataract Surgery             | N/A                       | N/A                       |
| Patient 14 | 64  | F   | White            | OD  | Aqueous | Cataract Surgery             | N/A                       | N/A                       |
| Patient 15 | 79  | M   | White            | OD  | Aqueous | Cataract Surgery             | N/A                       | N/A                       |

**Table S6. Demographic Information of Patients with new Choroidal Neovascularization (no prior activity or treatment for at least 6 months).**

| Identifier | Age | Sex | Race  | Eye | Sample  | Setting of Sample Collection | Prior Anti VEGF Treatment | Injection History                                                |
|------------|-----|-----|-------|-----|---------|------------------------------|---------------------------|------------------------------------------------------------------|
| Patient 1  | 81  | M   | White | OS  | Aqueous | Intravitreal Injection       | No                        | N/A                                                              |
| Patient 2  | 67  | F   | White | OS  | Aqueous | Intravitreal Injection       | No                        | N/A                                                              |
| Patient 3  | 74  | F   | White | OS  | Aqueous | Intravitreal Injection       | No                        | N/A                                                              |
| Patient 4  | 74  | F   | White | OD  | Aqueous | Intravitreal Injection       | No                        | N/A                                                              |
| Patient 5  | 71  | M   | White | OD  | Aqueous | Intravitreal Injection       | Yes                       | Last injection 3 years prior; quiescent until resumed treatment  |
| Patient 6  | 79  | M   | White | OS  | Aqueous | Intravitreal Injection       | No                        | N/A                                                              |
| Patient 7  | 83  | F   | White | OD  | Aqueous | Intravitreal Injection       | No                        | N/A                                                              |
| Patient 8  | 77  | F   | White | OD  | Aqueous | Intravitreal Injection       | No                        | N/A                                                              |
| Patient 9  | 77  | F   | White | OD  | Aqueous | Intravitreal Injection       | Yes                       | Last injection 8 months prior; quiescent until resumed treatment |
| Patient 10 | 89  | F   | White | OS  | Aqueous | Intravitreal Injection       | No                        | N/A                                                              |
| Patient 11 | 56  | F   | White | OS  | Aqueous | Intravitreal Injection       | No                        | N/A                                                              |
| Patient 12 | 91  | F   | White | OS  | Aqueous | Intravitreal Injection       | No                        | N/A                                                              |

**Table S7. Demographic Information of Patients with Choroidal Neovascularization undergoing ongoing treatment (within 3 months).**

| Identifier | Age | Sex | Race  | Eye | Sample  | Setting of Sample Collection | Prior Anti VEGF treatment | Injection History                                        |
|------------|-----|-----|-------|-----|---------|------------------------------|---------------------------|----------------------------------------------------------|
| Patient 13 | 89  | F   | White | OD  | Aqueous | Intravitreal Injection       | Yes                       | 4 <sup>th</sup> injection; last injection 2 months prior |
| Patient 14 | 78  | F   | White | OD  | Aqueous | Intravitreal Injection       | Yes                       | 3 <sup>rd</sup> injection; last injection 2 months prior |
| Patient 15 | 87  | F   | White | OD  | Aqueous | Intravitreal Injection       | Yes                       | 2 <sup>nd</sup> injection; last injection 2 months prior |
| Patient 16 | 69  | F   | White | OS  | Aqueous | Intravitreal Injection       | Yes                       | 2 <sup>nd</sup> injection; last injection 1 month prior  |
| Patient 17 | 90  | F   | White | OS  | Aqueous | Intravitreal Injection       | Yes                       | 2 <sup>nd</sup> injection; last injection 2 months prior |

**Supplementary Figures and Figure Legends**

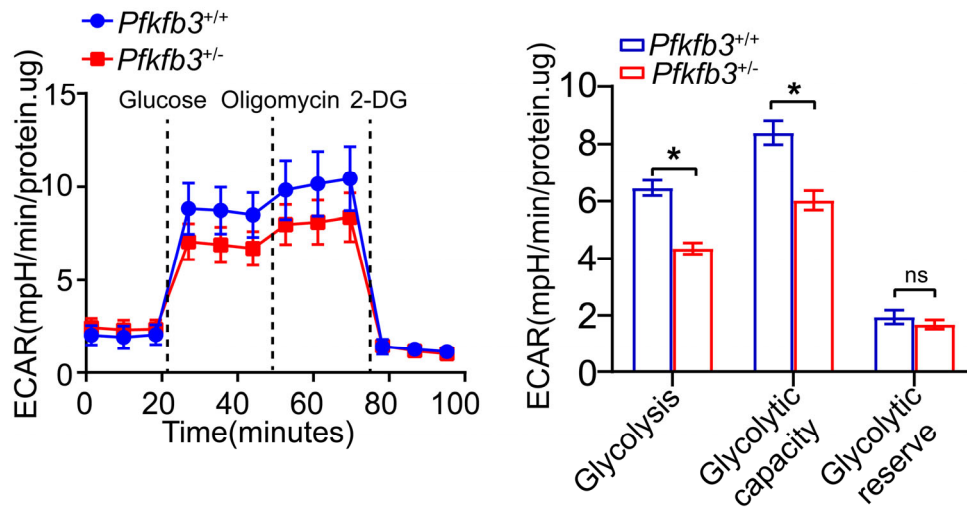

**Fig. S1. Heterozygous *Pfkfb3* deficiency in mice decreased the glucose-induced glycolysis in BMDMs.** ECAR analysis shows glycolytic function in *Pfkfb3*<sup>+/+</sup> and *Pfkfb3*<sup>+/-</sup> BMDMs (n=8-9). Data were presented as means ± SEM. Statistical significance was conducted by unpaired two-tailed Student's *t* test or unpaired two-tailed Student's *t* test with Welch's correction. \**p* < 0.05 was considered significant.

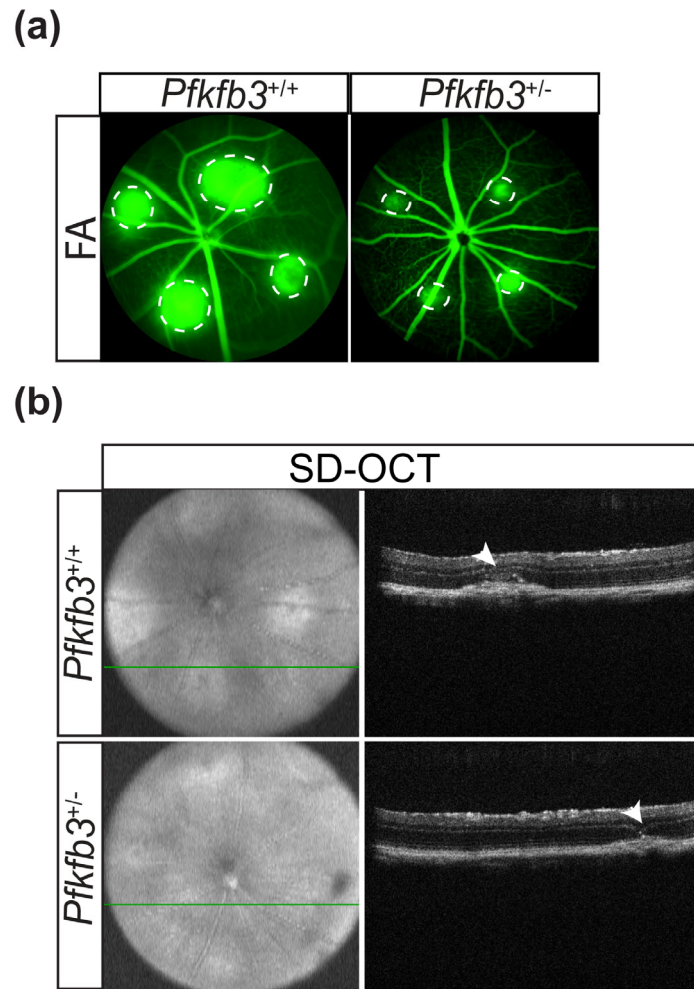

**Fig. S2. Heterozygous *Pfkfb3* deficiency in mice decreased the severity of vascular leakage and CNV thickness from CNV lesions.** (a) Representative images of fluorescein leakage from CNV lesions in *Pfkfb3*<sup>+/+</sup> and *Pfkfb3*<sup>+/-</sup> mice on day 7 after CNV induction. (b) Representative cross-sectional images of CNV obtained through SD-OCT in *Pfkfb3*<sup>+/+</sup> and *Pfkfb3*<sup>+/-</sup> mice on day 7 after CNV induction.

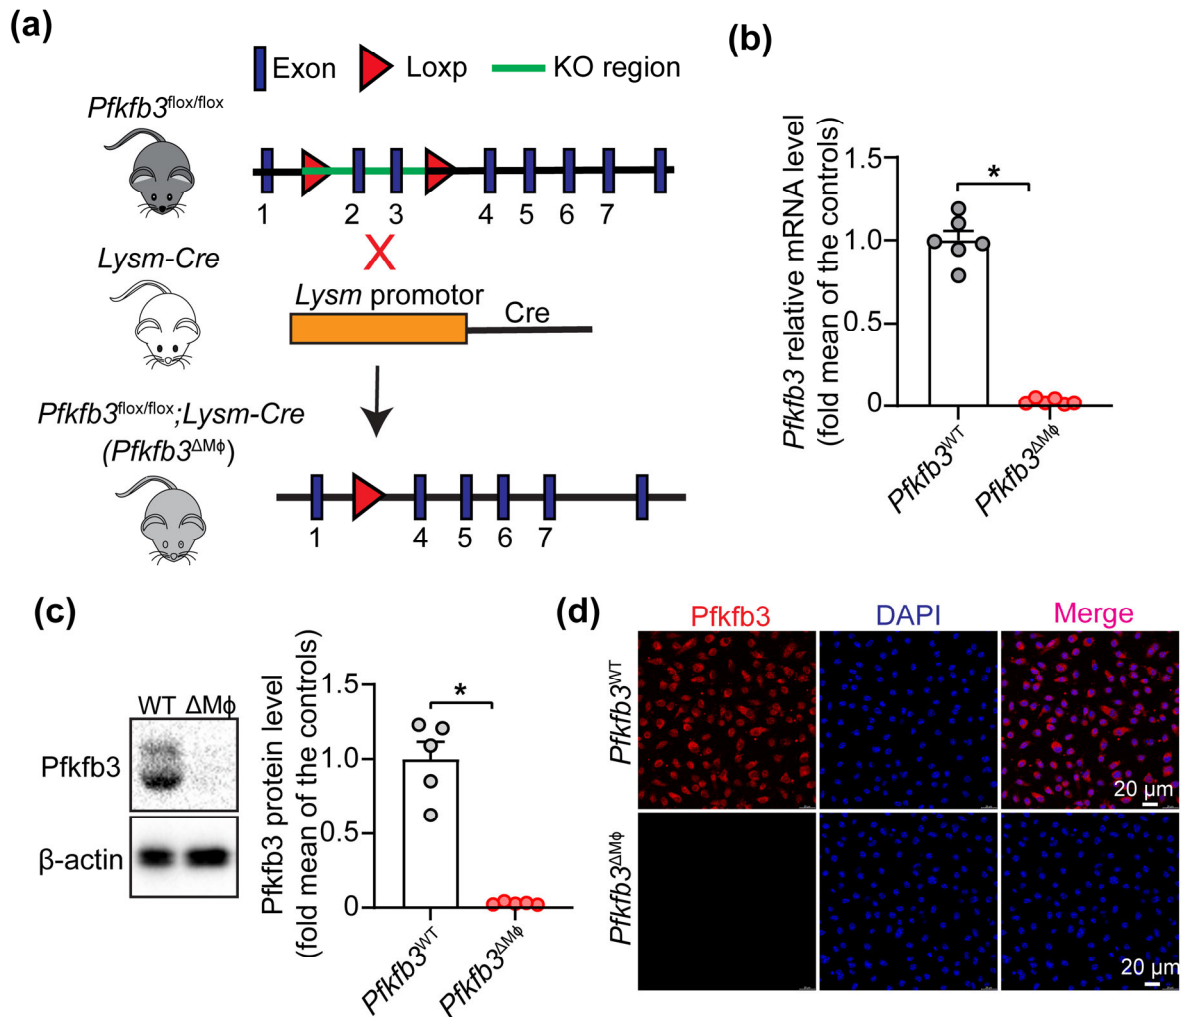

**Figure S3. Generation of myeloid-specific *Pfkfb3* knock out mice.** (a) Schematic diagram of strategy to generate myeloid-specific *Pfkfb3* KO mice. (b) qRT-PCR analysis of mRNA level of *Pfkfb3* in BMDMs from *Pfkfb3*<sup>WT</sup> and *Pfkfb3*<sup>ΔMφ</sup> mice (n=6 mice per group). (c) Western blot analysis and densitometric quantification of *Pfkfb3* in BMDMs from *Pfkfb3*<sup>WT</sup> and *Pfkfb3*<sup>ΔMφ</sup> mice (n=5 mice per group). (d) Representative *Pfkfb3* immunostaining images in BMDMs from *Pfkfb3*<sup>WT</sup> and *Pfkfb3*<sup>ΔMφ</sup> mice (Scale bar = 20  $\mu$ m). Data were presented as means  $\pm$  SEM. Statistical analysis was conducted by unpaired two-tailed Student's *t* test with Welch's correction.  $P < 0.05$  was considered significant.

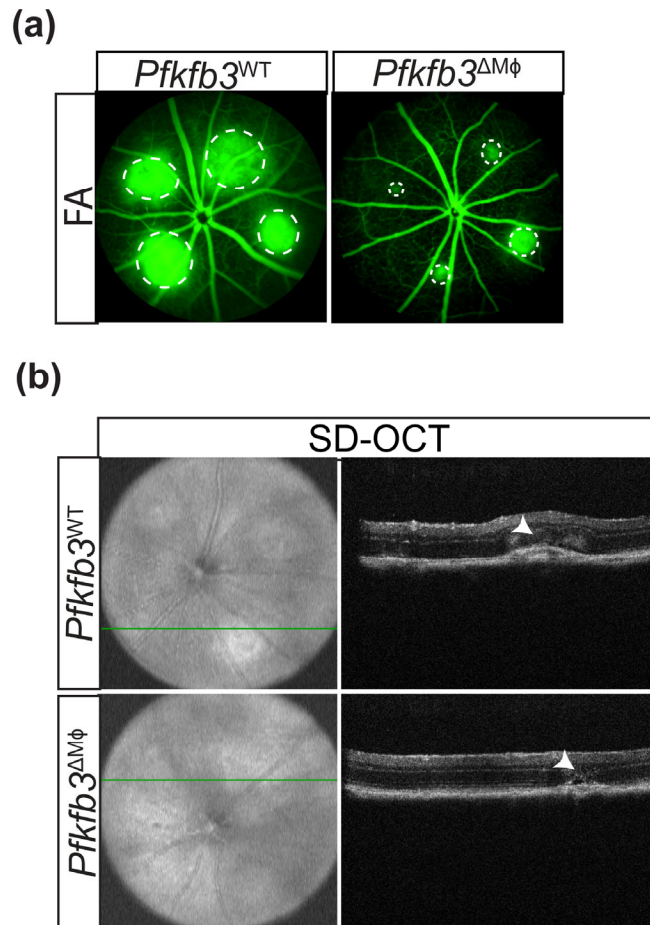

**Fig. S4. Myeloid-specific *Pfkfb3* deficiency in mice decreased the severity of vascular leakage and CNV thickness from CNV lesions.** (a) Representative images of fluorescein leakage from CNV lesions in *Pfkfb3*<sup>WT</sup> and *Pfkfb3*<sup>ΔMφ</sup> mice on day 7 after CNV induction. (b) Representative cross-sectional images of CNV obtained through SD-OCT in *Pfkfb3*<sup>WT</sup> and *Pfkfb3*<sup>ΔMφ</sup> mice on day 7 after CNV induction.



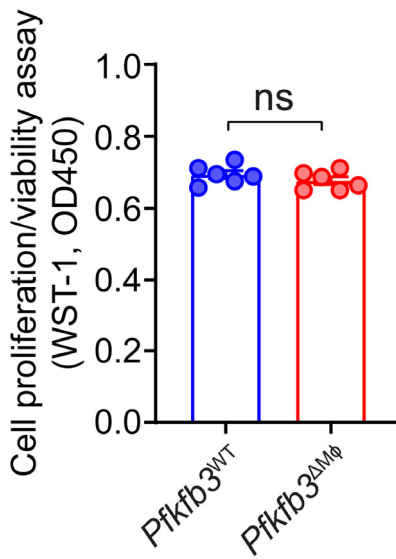

**Fig. S5. *Pfkfb3* loss had no effect on the cell viability of MΦ.** Cell proliferation/viability were measured in *Pfkfb3*<sup>WT</sup> and *Pfkfb3*<sup>ΔMφ</sup> BMDMs by WST-1 cell proliferation/viability assay. n = 6. Data were presented as means ± SEM. Statistical significance was conducted by unpaired two-tailed Student's *t* test. \* p < 0.05 was considered significant, ns, no significance.

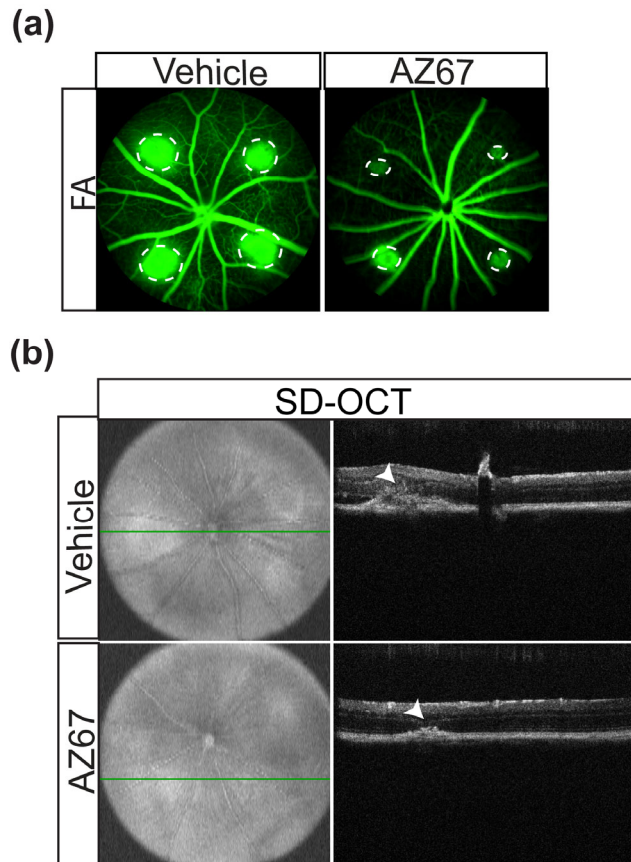

**Fig. S6. AZ67 administration decreased the severity of vascular leakage and CNV thickness from CNV lesions.** (a) Representative images of fluorescein leakage from CNV lesions vehicle- or AZ67-treated WT mice on day 7 after CNV induction. (b) Representative cross-sectional images of CNV obtained through SD-OCT in vehicle- or AZ67-treated WT mice on day 7 after CNV induction.
